# Supplementary material for: Tunable physical properties in BiAl1−xMnxO3 thin films with novel layered supercell structures
Source: PubMed Central journal article supplement — Nanoscale Adv. 2019 Nov 22;2(1):315–22. doi: 10.1039/c9na00566h (PMC9417154; doi:10.1039/c9na00566h), 2019-11-22
Supplement: NA-002-C9NA00566H-s001.pdf [file NA-002-C9NA00566H-s001.pdf]

## Supporting Information

### **Tunable Physical Properties in $\text{BiAl}_{1-x}\text{Mn}_x\text{O}_3$ Thin Films with Novel Layered Supercell Structures**

Shikhar Misra,<sup>a</sup> Leigang Li,<sup>a</sup> Xingyao Gao,<sup>a</sup> Jie Jian,<sup>a</sup> Zhimin Qi<sup>a</sup>, Dmitry Zemlyanov<sup>b</sup>, Haiyan Wang<sup>a,c,\*</sup>

<sup>a</sup>School of Materials Engineering, Purdue University, West Lafayette, Indiana 47907, United States

<sup>b</sup>Birck Nanotechnology Center, Purdue University, West Lafayette, Indiana 47907, United States

<sup>c</sup>School of Electrical and Computer Engineering, Purdue University, West Lafayette, Indiana 47907, United States

| Target Mn% | Film Mn% | Bi   | Al   | Mn   | Sr    | Ti    | O     |
|------------|----------|------|------|------|-------|-------|-------|
| 33         | 40       | 8.51 | 4.49 | 2.84 | 12.19 | 13.94 | 58.03 |
| 50         | 55       | 8.82 | 3.09 | 3.75 | 12.24 | 13.91 | 58.19 |
| 67         | 67       | 6.37 | 1.82 | 3.78 | 13.56 | 14.88 | 59.59 |
| 80         | 80       | 8.17 | 1.24 | 5.21 | 12.89 | 14.15 | 58.33 |

**Table S1.** Composition of the film calculated using EDS in SEM.

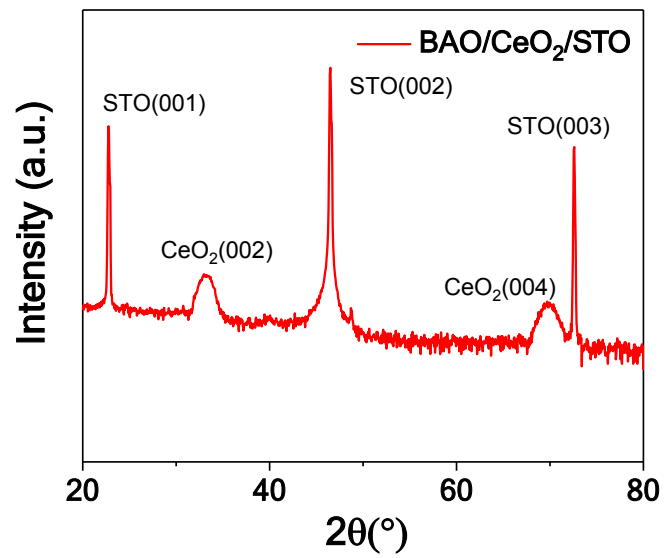

**Figure S1.** XRD of BAO film deposited on CeO<sub>2</sub> buffered STO

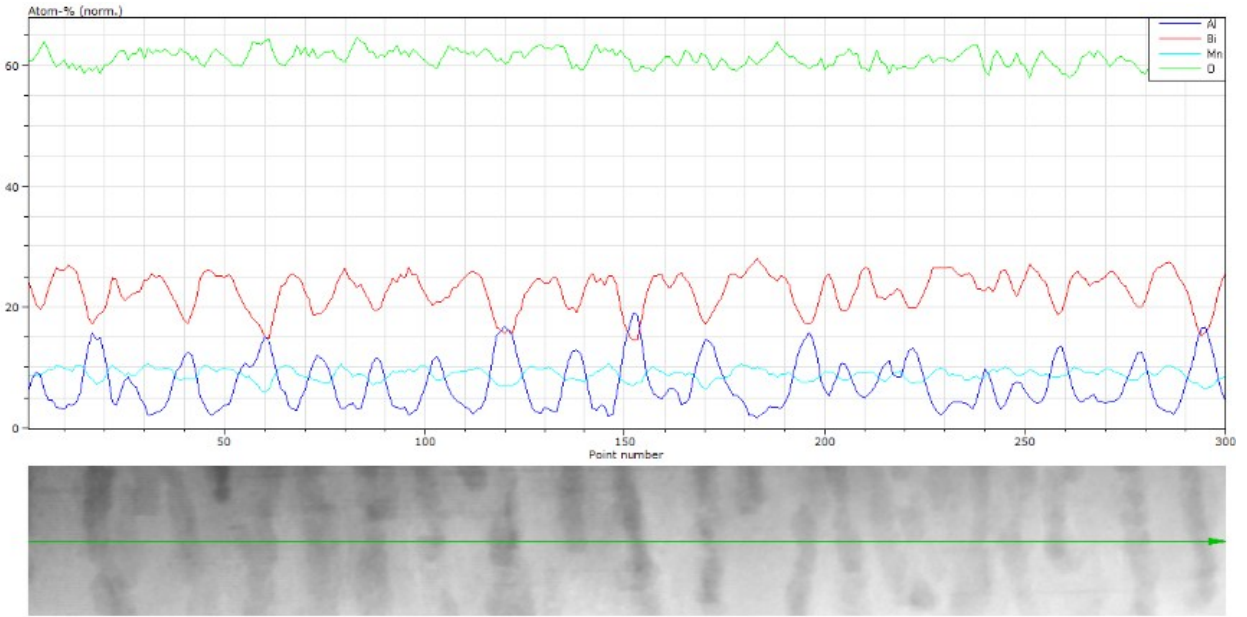

**Figure S2.** A line scan across the pillars, showing the pillar to be *Al-rich*, formed within the  $\text{BA}_{1-x}\text{M}_x\text{O}$  ( $x=0.67$ ) matrix.

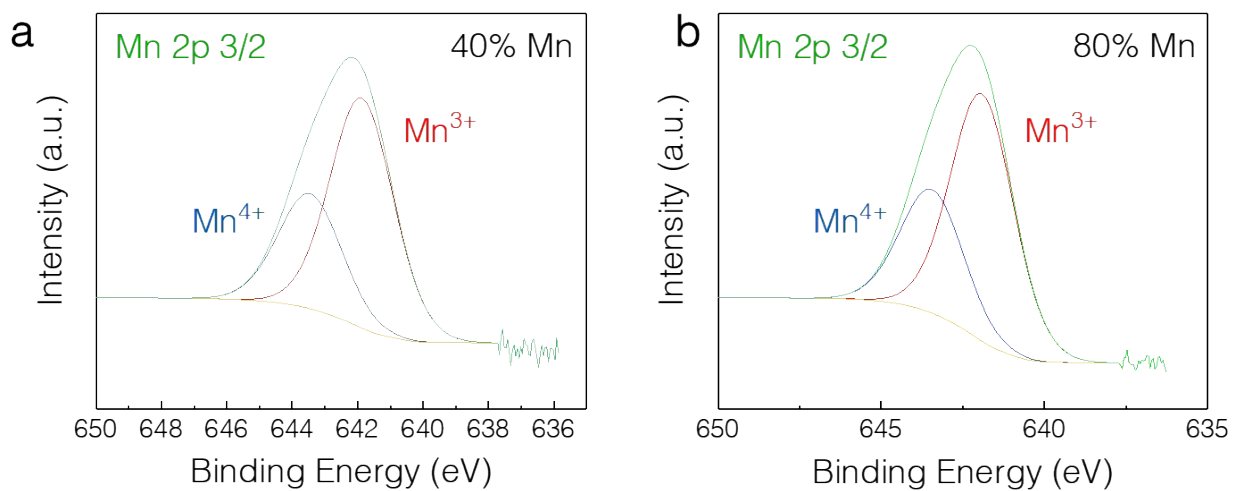

**Figure S3.** XPS analysis of two extreme composition (a)  $x=0.4$  and (b)  $x=0.8$  showing the two possible  $\text{Mn}^{3+}$  and  $\text{Mn}^{4+}$  oxidation states.

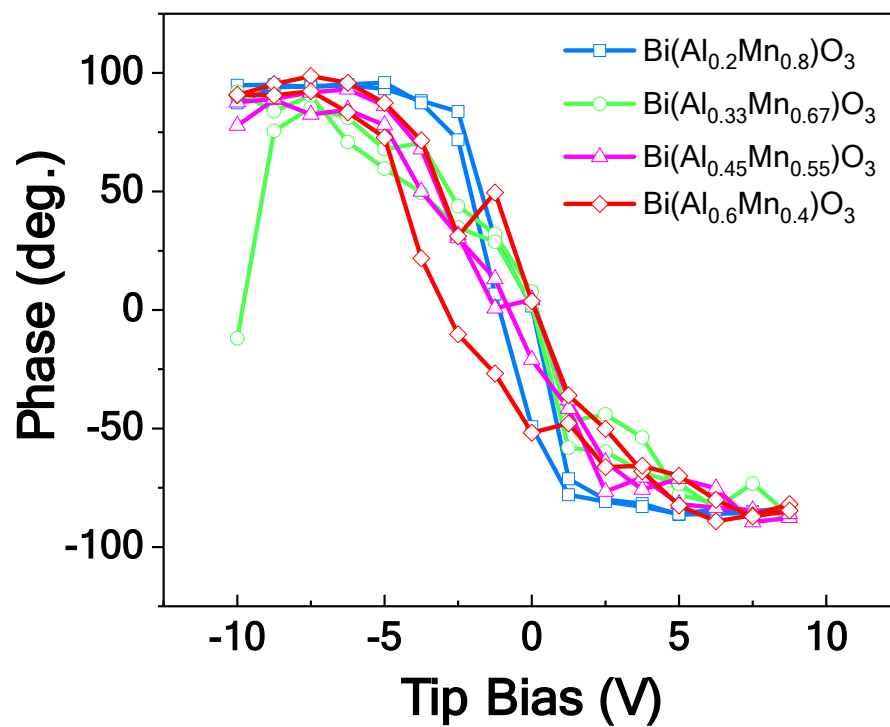

**Figure S4.** PFM phase hysteresis loops for all the different thin films.
